# Lung Mechanics of the Obese Undergoing Robotic Surgery and the Pursuit of Protective Ventilation

Xiaodong Bao, M.D., Ph.D., Marcos F. Vidal Melo, M.D., Ph.D.

Protective mechanical ventilation characterizes a strategy aimed at preventing lung overdistension (volutrauma), derecruitment (atelectrauma), and dysfunctional inflammation (biotrauma). It is usually implemented with physiologic tidal volumes, for which there is strong evidence of outcome benefits, and lung expansion including positive end-expiratory pressure (PEEP) and recruitment maneuvers, with persisting controversy. Protective ventilation has been mostly studied in critical care, despite the known effects of intraoperative ventilatory settings on postoperative pulmonary outcomes.<sup>1</sup> Current laparoscopic robotic surgery techniques challenge the anesthesiologist to optimize mechanical ventilation in conditions where the patient's physiologic complexity (e.g., obesity) frequently compounds with surgical physiologic burden (pneumoperitoneum, unphysiological Trendelenburg position).<sup>2</sup> Unfortunately, objective data are scarce to guide clinical practice in these procedures.

In this issue of *ANESTHESIOLOGY*, the article by Tharp *et al.* regarding 91 patients with body mass index (BMI) ranging from normal to greater than 40 kg/m<sup>2</sup> undergoing laparoscopic robotic surgery brings valuable data to the field.<sup>3</sup> The authors report significantly worse lung mechanics—compliance, driving pressures, and transpulmonary pressures—with increased BMI at different surgical stages. Lungs of severely obese patients were twice as rigid than those of patients with normal BMIs. Tharp *et al.* estimated optimal PEEP from lung mechanics measurements and showed this to be substantially higher than the applied PEEP in most patients in the different surgical stages and BMI categories, despite consistent use of currently proposed lung protective ventilation strategies.<sup>3</sup> Indeed, most patients presented mechanical evidence of atelectasis, suggesting that they were at risk for hypoxemia and atelectrauma.

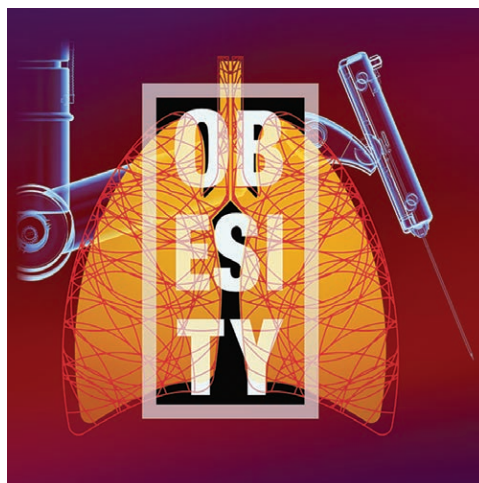

**“Current laparoscopic robotic surgery techniques challenge the anesthesiologist to optimize mechanical ventilation...”**

lulator-induced lung injury, as that is the pressure ultimately producing excessive lung stress and injury.<sup>6</sup> Assessment of this risk during robotic surgery is challenging because both lungs and chest wall mechanics change intraoperatively. Consequently, data are needed to guide practice.

A traditional physiologic method now clinically available to separate the pressure acting on the lungs (transpulmonary pressure) from that acting on the chest wall (pleural pressure) is esophageal balloon manometry. Transpulmonary pressure is calculated as the difference between airway and esophageal pressure, the latter used to estimate pleural pressures.<sup>3-6</sup> Tharp *et al.* document increases in tidal transpulmonary pressure of  $1.9 \pm 0.5$  cm H<sub>2</sub>O for each 5 kg/m<sup>2</sup> of BMI after anesthesia induction and before pneumoperitoneum. Such a finding emphasizes that susceptibility to stress injury during mechanical ventilation increases with BMI. Of note, that was not only due to higher airway pressures with BMI, but also because lung compliance, not chest wall compliance, worsened with BMI, increasing the fraction of airway pressure distributed to the lungs.

Image: A. Johnson, Vivo Visuals.

This editorial accompanies the article on p. 750.

Accepted for publication July 9, 2020. Published online first on August 17, 2020. From the Department of Anesthesia, Critical Care and Pain Medicine, Massachusetts General Hospital, Boston, United States.

Copyright © 2020, the American Society of Anesthesiologists, Inc. All Rights Reserved. *Anesthesiology* 2020; 133:695–7. DOI: 10.1097/ALN.0000000000003504

Data presented by Tharp *et al.*<sup>3</sup> indicate remarkably worse stiffening of the chest wall (greater than 300%) than of the lungs (approximately 50%) in the surgical stage of Trendelenburg position with docked robotic arms, as compared to measurements immediately after intubation in all BMI categories. These values were similar to those from a recent study in American Society of Anesthesiologists physical class I to II nonobese patients undergoing laparoscopic robotic surgery,<sup>4</sup> but contrast with substantially milder mechanical worsening during nonrobotic laparoscopic surgery,<sup>5</sup> emphasizing the compromise in respiratory mechanics specific to robotic cases. Such higher chest wall stiffness results in a lower fraction of airway pressure distributed to the lungs during the Trendelenburg position and docked robot condition than after intubation: 48 to 49% in non-obese patients, down from 62 to 63%,<sup>3,4</sup> and 56 to 57% for those with BMI 30 to 40 kg/m<sup>2</sup>, down from 78 to 80%.<sup>3</sup>

The clinical implication of these observations is very practical: absolute limits for airway plateau pressures, such as 30 cm H<sub>2</sub>O,<sup>7</sup> are not necessarily accurate during robotic surgery, as a substantial fraction of the airway pressure is not applied to distend the lungs but to expand the rigid chest wall.<sup>4</sup> Overzealous limitation of PEEP or tidal volume to maintain plateau pressures less than 28 to 30 cm H<sub>2</sub>O in such cases could expose patients to unnecessary hypoxemia, hypoventilation, and mechanical injury. Indeed, using electrical impedance tomography, Brandão *et al.*<sup>4</sup> found loss of dorsal aeration at the end of robotic surgery consistent with insufficient lung expansion despite use of conventional “protective” settings.<sup>7</sup> Dorsal ventilation was maintained in that condition (*i.e.*, the same tidal volume applied to a smaller lung), implying increased dorsal strain, driving pressure,<sup>3,4</sup> and risk for pulmonary complications.<sup>1</sup> Tharp *et al.* indicate that such unfavorable physiologic conditions worsen with BMI.<sup>3</sup>

Another contribution of the article by Tharp *et al.*<sup>3</sup> was the estimation of optimal PEEP, calculated as the applied PEEP added to the end-expiratory transpulmonary pressure. The latter represents the pressure across the lungs at end-exhalation, a positive value required for an open lung. End-expiratory transpulmonary pressures were negative in most patients throughout surgery, *i.e.*, most patients likely did not receive optimal protective settings. Furthermore, PEEP requirements increased with BMI, and they were the largest during Trendelenburg position.<sup>3</sup> At this stage, an optimal PEEP of  $9.7 \pm 3.7$  cm H<sub>2</sub>O was estimated for BMI less than 25 kg/m<sup>2</sup> and PEEP of  $21.3 \pm 7.4$  cm H<sub>2</sub>O for BMI greater than or equal to 40 kg/m<sup>2</sup>. These estimates challenge the adequacy of the “high-PEEP” of 12 cm H<sub>2</sub>O used in a recent major study showing no pulmonary outcome benefits in obese patients.<sup>8</sup> While there is substantial controversy about use of esophageal pressures to set PEEP,<sup>6</sup> Tharp *et al.*’s report provides a clear message on the shortcomings of current PEEP setting practices for the obese. Importantly, as noted by Dr. Wiener-Kronish in the Severinghaus Lecture during the 2019 Meeting of the American Society of Anesthesiologists, high PEEP levels optimized to lung mechanics have been

safely applied in critical care settings to obese patients with significant cardiac compromise. This was recently confirmed in obese acute respiratory distress syndrome patients who benefitted from PEEP increases to approximately 20 cm H<sub>2</sub>O with reduction of required hemodynamic support and no adverse effect on right ventricular function.<sup>9</sup>

Tharp *et al.* observed high variability in optimal PEEP depending on patient, surgical stage, and BMI.<sup>3</sup> Consequently, an empirical PEEP could be either insufficient to recruit atelectatic lung or excessive and produce overdistension. Here, the clinical message is also clear. Similar to hemodynamic monitoring, which is advanced from noninvasive to pulmonary artery catheter and transesophageal echocardiography as patient and surgical complexity increase, respiratory monitoring requires individualization. Usually, our respiratory monitoring allows for safe management, and new surgical challenges, as robotic surgery may require advanced techniques such as esophageal manometry in selected cases for best management. Conceptually, that appears appropriate: anesthesiologic innovation goes hand in hand with surgical innovation.

More still needs to be learned. The implications of high PEEP to intraocular and intracranial pressures in steep Trendelenburg position need better understanding, and could be influenced by worsened chest wall compliance.<sup>10</sup> Airway closure during surgical pneumoperitoneum observed in obese patients creates challenges for accurate estimation of transpulmonary pressures.<sup>11</sup> A recently completed observational study will bring data on pulmonary complications and ventilatory settings during laparoscopic robotic surgery.<sup>12</sup>

Tharp *et al.* add to the literature that associates risk of lung mechanical injury to BMI during mechanical ventilation for laparoscopic robotic surgery. The investigators teach us that we should be prepared to add respiratory monitors to our clinical armamentarium according to case and patient complexity, and apply ventilator settings not currently usual during robotic surgery in the obese if we are to follow protective principles to their physiologic meaning.

## Research Support

Dr. Vidal Melo was funded by National Institutes of Health, National Heart, Lung, and Blood Institute (Bethesda, Maryland) grant No. UH3-HL140177.

## Competing Interests

Dr. Bao received research support from Edwards Lifesciences (Irvine, California) and Pacira Pharmaceuticals, Inc. (Parsippany-Troy Hills, New Jersey), on projects unrelated to the current article. Dr. Vidal Melo declares no competing interests.

## Correspondence

Address correspondence to Dr. Vidal Melo: VidalMelo.Marcos@mgh.harvard.edu.

## References

1. Ladha K, Vidal Melo MF, McLean DJ, Wanderer JP, Grabitz SD, Kurth T, Eikermann M: Intraoperative protective mechanical ventilation and risk of postoperative respiratory complications: Hospital based registry study. *BMJ* 2015; 351:h3646
2. Sprung J, Whalley DG, Falcone T, Warner DO, Hubmayr RD, Hammel J: The impact of morbid obesity, pneumoperitoneum, and posture on respiratory system mechanics and oxygenation during laparoscopy. *Anesth Analg* 2002; 94:1345–50
3. Tharp WG, Murphy S, Breidenstein MW, Love C, Booms C, Rafferty MN, Friend AF, Perrapato S, Ahern TP, Dixon AE, Bates JHT, Bender SP: Body habitus and dynamic surgical conditions independently impair pulmonary mechanics during robotic-assisted laparoscopic surgery: A cross-sectional study. *ANESTHESIOLOGY* 2020; 133:750–63
4. Brandão JC, Lessa MA, Motta-Ribeiro G, Hashimoto S, Paula LF, Torsani V, Le L, Bao X, Eikermann M, Dahl DM, Deng H, Tabatabaei S, Amato MBP, Vidal Melo MF: Global and regional respiratory mechanics during robotic-assisted laparoscopic surgery: A randomized study. *Anesth Analg* 2019; 129:1564–73
5. Cinnella G, Grasso S, Spadaro S, Rauseo M, Mirabella L, Salatto P, De Capraris A, Nappi L, Greco P, Dambrosio M: Effects of recruitment maneuver and positive end-expiratory pressure on respiratory mechanics and transpulmonary pressure during laparoscopic surgery. *ANESTHESIOLOGY* 2013; 118:114–22
6. Williams EC, Motta-Ribeiro GC, Vidal Melo MF: Driving pressure and transpulmonary pressure: How do we guide safe mechanical ventilation? *ANESTHESIOLOGY* 2019; 131:155–63
7. Futier E, Constantin JM, Paugam-Burtz C, Pascal J, Eurin M, Neuschwander A, Marret E, Beaussier M, Gutton C, Lefrant JY, Allaouchiche B, Verzilli D, Leone M, De Jong A, Bazin JE, Pereira B, Jaber S; IMPROVE Study Group: A trial of intraoperative low-tidal-volume ventilation in abdominal surgery. *N Engl J Med* 2013; 369:428–37
8. Writing Committee for the PROBESE Collaborative Group of the PROtective VEntilation Network (PROVENet) for the Clinical Trial Network of the European Society of Anaesthesiology, Bluth T, Serpa Neto A, Schultz MJ, Pelosi P, Gama de Abreu M: Effect of intraoperative high positive end-expiratory pressure (PEEP) with recruitment maneuvers vs low PEEP on postoperative pulmonary complications in obese patients: A randomized clinical trial. *JAMA* 2019; 321:2292–305
9. For the investigators of the lung rescue team, Florio G, Ferrari M, Bittner EA, De Santis Santiago R, Pirrone M, Fumagalli J, Teggie Droghi M, Mietto C, Pinciroli R, Berg S, Bagchi A, Shelton K, Kuo A, Lai Y, Sonny A, Lai P, Hibbert K, Kwo J, Pino RM, Wiener-Kronish J, Amato MBP, Arora P, Kacmarek RM, Berra L: A lung rescue team improves survival in obesity with acute respiratory distress syndrome. *Crit Care* 2020; 24:4
10. Chen H, Chen K, Xu JQ, Zhang YR, Yu RG, Zhou JX: Intracranial pressure responsiveness to positive end-expiratory pressure is influenced by chest wall elastance: A physiological study in patients with aneurysmal subarachnoid hemorrhage. *BMC Neurol* 2018; 18:124
11. Grieco DL, Anzellotti GM, Russo A, Bongiovanni F, Costantini B, D'Indinosante M, Varone F, Cavallaro F, Tortorella L, Polidori L, Romanò B, Gallotta V, Dell'Anna AM, Sollazzi L, Scambia G, Conti G, Antonelli M: Airway closure during surgical pneumoperitoneum in obese patients. *ANESTHESIOLOGY* 2019; 131:58–73
12. Queiroz VNF, da Costa LGV, Barbosa RP, Takaoka F, De Baerdemaeker L, Cesar DS, D'Orto UC, Galdi JR, Gottumukkala V, Cata JP, Hemmes SNT, Hollman MW, Kalmar A, Moura LAB, Mariano RM, Matot I, Mazzinari G, Mills GH, Posso IP, Teruya A, Vidal Melo MF, Sprung J, Weingarten TN, Treschan TA, Koopman S, Eidelman L, Chen LL, Lee JW, Ariño Irujo JJ, Tena B, Groeben H, Pelosi P, de Abreu MG, Schultz MJ, Serpa Neto A; AVATaR and PROVE Network investigators: International multicenter observational study on assessment of ventilatory management during general anaesthesia for robotic surgery and its effects on postoperative pulmonary complication (AVATaR): Study protocol and statistical analysis plan. *BMJ Open* 2018; 8:e021643
